# Supplementary material
Source: publisher site journal article supplement (https://www.spandidos-publications.com/2987/downloadSupplementary)

Figure S1. The VEGFR2 overexpression vector and empty vector were insert in Hep3b cells and detected by fluorescence microscopy, magnification, x100.

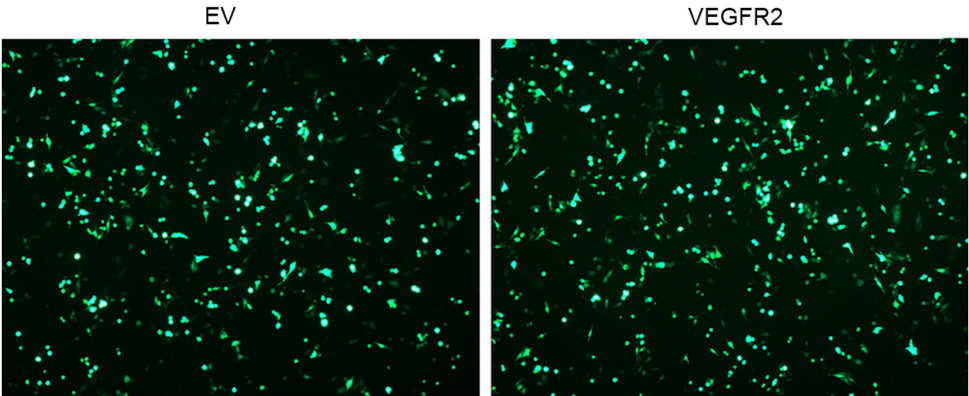

Supplement: Supplementary file 1 [file downloadSupplementary]
